# Supplementary material for: Preparation and in Vivo Evaluation of a Dutasteride-Loaded Solid-Supersaturatable Self-Microemulsifying Drug Delivery System
Source: PubMed Central journal article supplement (PMC4463677; doi:10.3390/ijms160510821), 2015-05-13
Supplement: ijms-16-10821-s001.pdf [file ijms-16-10821-s001.pdf]

# Supplementary Information

**Table S1.** The chemical name, molecular structure and classification of excipient used.

| Excipient        | Chemical Name                                                                      | Molecular Structure                                                                  | Classification           |
|------------------|------------------------------------------------------------------------------------|--------------------------------------------------------------------------------------|--------------------------|
| Soluplus         | polyvinyl caprolactam–<br>polyvinyl acetate–polyethylene<br>glycol graft copolymer | 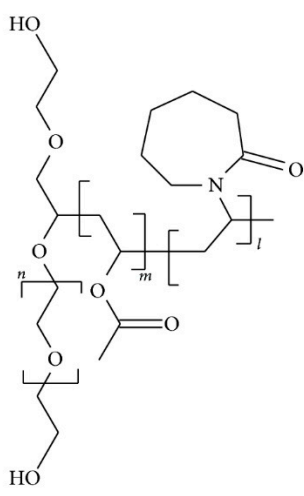   | Polymeric<br>solubilizer |
| Cremophor<br>EL  | polyoxyl 35 hydrogenated<br>castor oil                                             |   | Surfactant               |
| PVP K30          | polyvinylpyrrolidone                                                               |  | Hydrophilic<br>polymer   |
| PVP-VA 64        | polyvinylpyrrolidone<br>vinyl acetate                                              |  | Hydrophilic<br>polymer   |
| Capryol 90       | propylene glycol<br>monocaprylate                                                  |  | Oil                      |
| Transcutol<br>HP | highly purified diethylene<br>glycol monoethyl ether                               |  | Surfactant               |

Table S1. Cont.

| Excipient | Chemical Name                                             | Molecular Structure                                                                                                                       | Classification      |
|-----------|-----------------------------------------------------------|-------------------------------------------------------------------------------------------------------------------------------------------|---------------------|
| HPMC 2910 | hydroxypropyl methylcellulose                             | 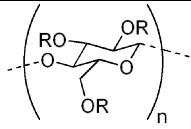<br>$R = H \text{ or } CH_3 \text{ or } CH_2CH(OH)CH_3$ | Hydrophilic polymer |
| HPC       | hydroxypropyl cellulose                                   | <br>$R = H \text{ or } CH_2CH(OH)CH_3$                  | Hydrophilic polymer |
| PEG 6000  | polyethylene glycol 6000                                  |                                                         | Hydrophilic polymer |
| Lactose   | $\beta$ -D-galactopyranosyl-(1 $\rightarrow$ 4)-D-glucose |                                                         | Diluent             |
